# Supplementary material for: ABCA7 polymorphisms correlate with memory impairment and default mode network in patients with APOEε4-associated Alzheimer’s disease
Source: Alzheimers Res Ther. 2019 Dec 12;11:103. doi: 10.1186/s13195-019-0563-3 (PMC6909474; doi:10.1186/s13195-019-0563-3)
Supplement: Supplementary file 3 — Additional file 3 : Table S2. Seed-to-voxel analysis reveals brain regions with significant effects of APOE-ABCA7 (rs3764650) interactions on functional connectivity in brain networks. [file 13195_2019_563_MOESM3_ESM.docx]

**Title**

*ABCA7* Polymorphisms Correlate with Memory Impairment and Default Mode Network in Patients with *APOE*ε4 Associated Alzheimer’s Disease

**Journal name**

Alzheimer’s research & therapy

**Author names**

Ya-Ting Chang*1 MD, PhD; Shih-Wei Hsu2, MD; Shu-Hua Huang3 MD; Chi-Wei Huang1 MD, PhD; Wen-Neng Chang1 MD; Chia-Yi Lien1 MD; Jun-Jun Lee1 MD; Chen-Chang Lee2 PhD; Chiung-Chih Chang*1 MD, PhD

1Department of Neurology, Institute of translational research in biomedicine, Kaohsiung Chang Gung Memorial Hospital, Chang Gung University College of Medicine, Kaohsiung 83301, Taiwan

2Department of Radiology, Kaohsiung Chang Gung Memorial Hospital, Chang Gung University College of Medicine, Kaohsiung, Taiwan

3Department of Nuclear Medicine, Kaohsiung Chang Gung Memorial Hospital, Chang Gung University College of Medicine, Kaohsiung, Taiwan

*Ya-Ting Chang and Chiung-Chih Chang are co‐corresponding authors

Submission Type: Article

**Table S2** Seed-to-voxel analysis reveals brain regions with significant effects of *APOE-ABCA7* (rs3764650) interactions on functional connectivity in brain networks

| **Seed** | | **Cluster** | **MNI**  **(x, y, z)** | **Cluster size** | **T** | **p-FDR**  **of size** |
| --- | --- | --- | --- | --- | --- | --- |
| DMPFC | Right | No peak cluster |  |  |  |  |
| Left | No peak cluster |  |  |  |  |
| PCC | Right | No peak cluster |  |  |  |  |
| Left | Left lingual | -14, -82, -10 | 456 | 4.15 | 0.004 |
| Entorhinal | Right | Left precuneus | -16, -50, 10 | 472 | 4.91 | 0.006 |
|  | Left superior parietal gyrus | -32, -66, 48 | 662 | 3.92 | 0.001 |
| Left | No peak cluster |  |  |  |  |

T maxima, and contiguous voxels of cluster size are shown. The significance clusters are detected with thresholds of FDR-corrected P < 0.05 at the cluster-level and uncorrected P < 0.001 at the peak-level. DMPFC, dorsal medial prefrontal cortex; FDR, false discovery rate; MNI (x, y, z), local maxima coordinates on Montreal Neurological Institute template brain; PCC, posterior cingulate cortex.
